# Supplementary material for: Development of a Nanoparticle-Based Approach for the Blood–Brain Barrier Passage in a Murine Model of Amyotrophic Lateral Sclerosis
Source: MDPI journal article supplement (doi:10.3390/cells11244003), 2022-12-10
Supplement: s1 [file s1]

# Development of a nanoparticle-based approach for the blood-brain barrier passage in a murine model of amyotrophic lateral sclerosis

## Supplementary Material

### 1. Biotin-derivatives for ANANAS decoration

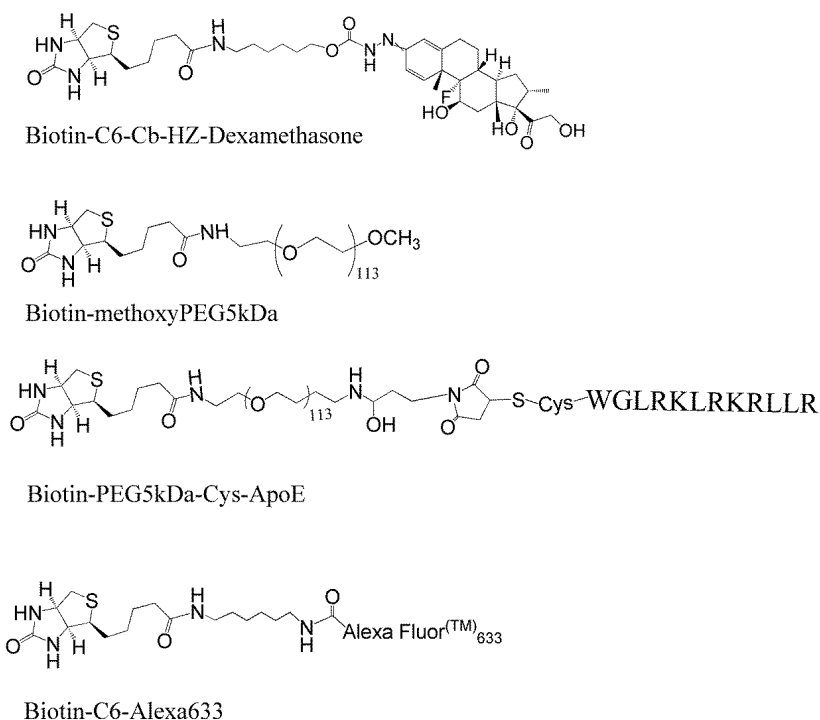

**Figure S 1:** Chemical structures of the biotin derivatives used for ANANAS decoration

### 2. ApoE peptide purification

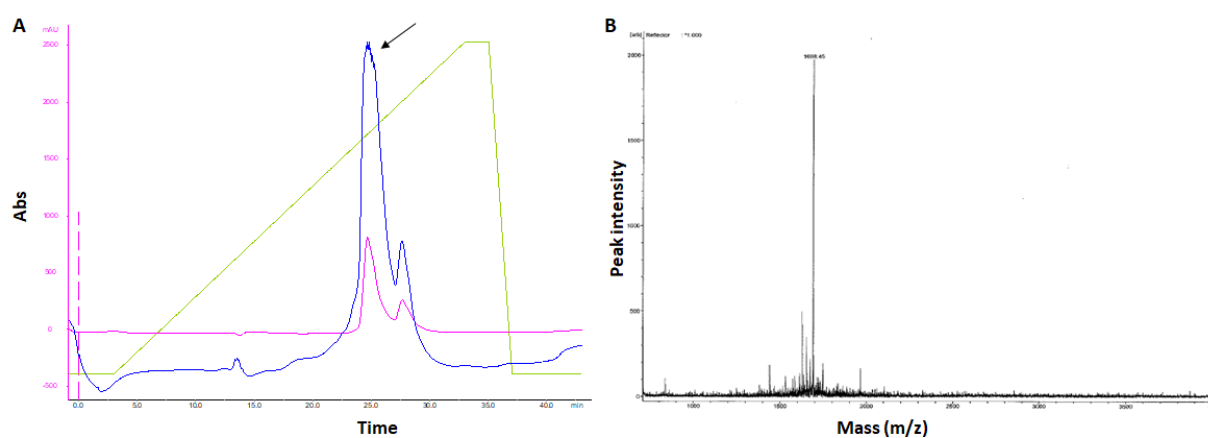

**Figure S 2:** After synthesis, ApoE peptide was purified by reverse phase high performance liquid chromatography (HPLC) on a semi-preparative C4 column. Panel A shows the absorbance of the injected peptide (6 mg/ml) at 214 nm (blue, amide bound) and 280 nm (red, tryptophan absorption), the arrow indicates the peak corresponding to the peptide. The molecular weight of the sequence was verified using a MALDI-TOF mass spectrometer in reflector mode (Panel, B).

### 3. ANANAS-ApoE pre-formulation studies

In the case of the ANANAS-ApoE assemblies, pre-formulation studies were carried out to assess the NP maximum loading capacity for biotin-Cys-ApoE and the colloidal stability of the formulations as a function of the ApoE load. To this end, core ANANAS were dissolved in 10 mM phosphate, 150 mM NaCl, pH 7.4 (PBS buffer) +0.1% BSA and mixed with biotin-Cys-ApoE at ApoE/NP molar ratios between 0 to 1340, corresponding to theoretical % biotin binding site (%BBS) coverages between 0-100.

The NP surface saturation limit for the biotin-Cys-ApoE was measured indirectly by assessing the ability of ANANAS-ApoE assemblies generated at BBS coverage between 0 to 100% to further tether biotin-Horseradishperoxidase (b-HRP; ANANAS nanotech, code# B-H0101). In brief, different ANANAS-ApoE assemblies (BBS% 0, 2.5; 5.0; 10; 20; 40; 60; 100; 4  $\mu\text{g/mL}$ ) were immobilized (1.5  $\mu\text{L}$ ) onto two nitrocellulose membrane. After blocking with a 3% BSA in PBS, the membranes were incubated with b-HRP (1 $\mu\text{g/mL}$  in PBS +0.05% tween20, RT, 1h) or non biotinylated HRP (control). After extensive washing, membranes were incubated with the 3, 3'-diaminobenzidine (DAB) in the presence of  $\text{H}_2\text{O}_2$ . No signal was detected at BBS coverage above 40%. This value was estimated as the NP maximum loading capability for biotin-Cys-ApoE.

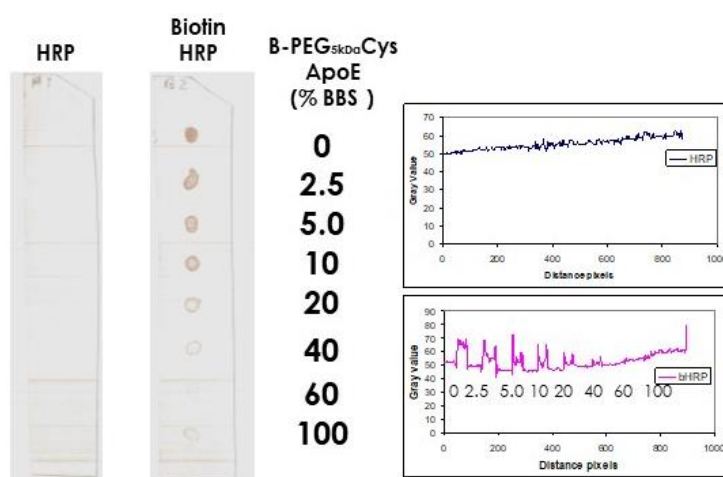

**Figure S 3:** Dot blot assay on nitrocellulose membrane spotted with ANANAS/biotin-PEG-Cys-ApoE mixtures obtained at different ApoE:NP ratios

The size of the ANANAS-ApoE assemblies generated at different ApoE:NP ratios was measured by dynamic light scattering one and 24h after assembly (to assess colloidal stability). Assemblies were colloidally stable up to a maximum 10% BBS coverage with the ApoE derivative.

**Table S1.** Pre-formulation data on ANANAS-ApoE assemblies. Core NPs were mixed in PBS+ 0.1% BSA with different molar ratios of biotin-PEG5kDa-Cys-ApoE. The size of the assemblies was measured 1 hour after preparation and after 24h storage at 4°C. The compositions highlighted in grey were judged unstable.

| Formulation name  | ApoE/NP (mol:mol) | Biotin-Cys-ApoE (% BBS) | Z-Average (nm) 1h | PDI (1h) | Z-Average (nm) 24h | PDI 24h |
|-------------------|-------------------|-------------------------|-------------------|----------|--------------------|---------|
| ANANAS-ApoE0      | 0.00              | 0.00                    | 136.4±4.9         | 0.32     | 139.1±14.1         | 0.355   |
| ANANAS-ApoE2.5    | 33.50             | 2.50                    | 138.0±12.5        | 0.33     | 157.2±27.3         | 0.417   |
| ANANAS-ApoE5      | 67.00             | 5.00                    | 138.9±0.26        | 0.26     | 154.4±26.9         | 0.318   |
| ANANAS-ApoE10 (*) | 134.00            | 10.00                   | 140.5±2.9         | 0.25     | 142.4±7.0          | 0.360   |
| ANANAS-ApoE20     | 268.00            | 20.00                   | 140.7±3.0         | 0.33     | 160.7±27.3         | 0.388   |
| ANANAS-ApoE40     | 536.00            | 40.00                   | 168.0±7.3         | 0.36     | 718.8±191.1        | 0.834   |
| ANANAS-ApoE60     | 804.00            | 60.00                   | 207.30±17.8       | 0.58     | 1,908.7±644.3      | 0.988   |
| ANANAS-ApoE100    | 1,340.00          | 100.00                  | 340.90±57.1       | 0.59     | 2,717.7±969.7      | 1.000   |

(\*) selected for the in vivo studies

Since NP in vivo longitudinal tracking with the IVIS instrumentation necessitates the particles to be fluorescent, we performed additional pre-formulation studies to assess the impact of biotin-C6-alexa<sub>633</sub> on the colloidal stability of ApoE:ANANAS assemblies. Unfortunately, in the presence of the alexa<sub>633</sub> dye the nanoparticles loose solubility (not shown), likely because of non-specific interaction of the negatively charged dye with the highly positive charged ApoE moiety.

#### 4. ANANAS-Dex pre-formulation studies

ANANAS-Dex was generated by mixing core NPs with sub-saturating (57.5% of BBS) amounts of B-C6-Cb-Hz-Dex. The lack of unbound conjugate in the assembly solution was verified by gel permeation chromatography by comparing the chromatogram of the low MW dexamethasone conjugate (two peaks - cis and trans Hz- with retention volume about 27 mL) before and after ANANAS (retention time about 8 mL) mixing (Figure S 4).

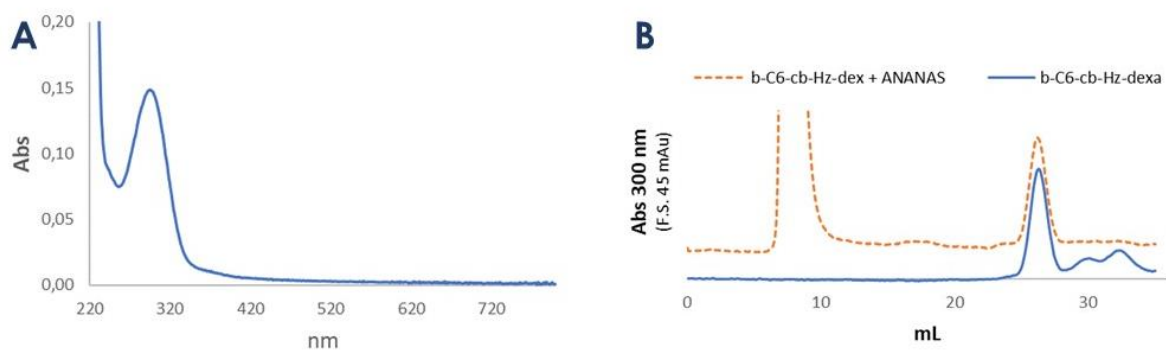

**Figure S 4:** ANANAS-Dex preformulation study. A) UV-Vis spectrum of Biotin-C6-Cb-Hz-Dex ( $8 \times 10^{-6} M$  in water) showing the characteristic dexamethasone-Hz conjugate absorbance maximum at 300 nm. B) Gel permeation chromatograms of biotin-C6-Cb-Hz-Dex as such and after addition of ANANAS core NPs (57.5% BBS coverage). Samples were eluted in a Superose prep<sup>TM</sup> medium, using the GE-Aktaflux- FPLC apparatus, PBS as eluant.
